# Supplementary material for: Individual Resonant Frequencies at Low-Gamma Range and Cognitive Processing Speed
Source: MDPI journal article supplement (doi:10.3390/jpm11060453), 2021-05-23
Supplement: s1 [file s1]

**Table S1.** Bayesian correlation outcomes between EEG measures and cognitive measures.

Here we use the following terms to interpret the level of evidence: Antecdotal  $BF_{10} > 3$  Moderate  $BF_{10} > 3$ ; Strong -  $BF_{10} > 10$ ; Very strong -  $BF_{10} > 30$ ; Extreme -  $BF_{10} > 100$

**Bayesian Pearson Correlations** 2-Choice response time task

|              | PLI       |        |         | ERSP      |        |         |
|--------------|-----------|--------|---------|-----------|--------|---------|
|              | 40-Hz EFR | IGF    | IGF-EFR | 40-Hz EFR | IGF    | IGF-EFR |
| Pearson's r  | 0.084     | -0.180 | 0.015   | 0.089     | -0.202 | 0.028   |
| $BF_{10}$    | 0.230     | 0.354  | 0.205   | 0.233     | 0.409  | 0.207   |
| Upper 95% CI | 0.383     | 0.148  | 0.325   | 0.387     | 0.127  | 0.336   |
| Lower 95% CI | -0.237    | -0.461 | -0.299  | -0.233    | -0.478 | -0.287  |

**Bayesian Pearson Correlations** Simple reaction time task

|              | PLI       |        |         | ERSP      |        |         |
|--------------|-----------|--------|---------|-----------|--------|---------|
|              | 40-Hz EFR | IGF    | IGF-EFR | 40-Hz EFR | IGF    | IGF-EFR |
| Pearson's r  | 0.046     | -0.030 | 0.036   | 0.031     | 0.013  | 0.031   |
| $BF_{10}$    | 0.212     | 0.208  | 0.209   | 0.208     | 0.205  | 0.208   |
| Upper 95% CI | 0.351     | 0.286  | 0.343   | 0.339     | 0.324  | 0.339   |
| Lower 95% CI | -0.272    | -0.338 | -0.280  | -0.285    | -0.300 | -0.285  |

**Bayesian Pearson Correlations** Arithmetic decision task

|              | PLI       |        |         | ERSP      |        |         |
|--------------|-----------|--------|---------|-----------|--------|---------|
|              | 40-Hz EFR | IGF    | IGF-EFR | 40-Hz EFR | IGF    | IGF-EFR |
| Pearson's r  | -0.125    | -0.064 | -0.155  | -0.123    | -0.117 | -0.162  |
| $BF_{10}$    | 0.266     | 0.219  | 0.306   | 0.264     | 0.257  | 0.319   |
| Upper 95% CI | 0.200     | 0.256  | 0.172   | 0.202     | 0.208  | 0.165   |
| Lower 95% CI | -0.417    | -0.366 | -0.441  | -0.415    | -0.410 | -0.447  |

**Bayesian Pearson Correlations** Lexical decision task

|              | PLI       |        |         | ERSP      |        |         |
|--------------|-----------|--------|---------|-----------|--------|---------|
|              | 40-Hz EFR | IGF    | IGF-EFR | 40-Hz EFR | IGF    | IGF-EFR |
| Pearson's r  | -0.095    | -0.021 | -0.109  | -0.027    | -0.183 | -0.066  |
| $BF_{10}$    | 0.238     | 0.206  | 0.250   | 0.207     | 0.360  | 0.220   |
| Upper 95% CI | 0.228     | 0.294  | 0.215   | 0.288     | 0.145  | 0.254   |
| Lower 95% CI | -0.392    | -0.330 | -0.404  | -0.335    | -0.463 | -0.368  |

**Bayesian Pearson Correlations** Semantic categorisation

|              | PLI       |        |         | ERSP      |        |         |
|--------------|-----------|--------|---------|-----------|--------|---------|
|              | 40-Hz EFR | IGF    | IGF-EFR | 40-Hz EFR | IGF    | IGF-EFR |
| Pearson's r  | -0.203    | -0.042 | -0.227  | -0.145    | -0.101 | -0.183  |
| $BF_{10}$    | 0.412     | 0.211  | 0.492   | 0.292     | 0.243  | 0.361   |
| Upper 95% CI | 0.126     | 0.275  | 0.102   | 0.181     | 0.222  | 0.145   |
| Lower 95% CI | -0.479    | -0.348 | -0.497  | -0.433    | -0.397 | -0.463  |

**Bayesian Pearson Correlations** Object judgement task

|             | PLI       |       |         | ERSP      |       |         |
|-------------|-----------|-------|---------|-----------|-------|---------|
|             | 40-Hz EFR | IGF   | IGF-EFR | 40-Hz EFR | IGF   | IGF-EFR |
| Pearson's r | -0.158    | 0.213 | -0.163  | -0.103    | 0.095 | -0.122  |

**Bayesian Pearson Correlations** Object judgement task

|                  | PLI       |        |         | ERSP      |        |         |
|------------------|-----------|--------|---------|-----------|--------|---------|
|                  | 40-Hz EFR | IGF    | IGF-EFR | 40-Hz EFR | IGF    | IGF-ERF |
| BF <sub>10</sub> | 0.311     | 0.442  | 0.320   | 0.244     | 0.238  | 0.263   |
| Upper 95% CI     | 0.169     | 0.486  | 0.164   | 0.220     | 0.392  | 0.203   |
| Lower 95% CI     | -0.443    | -0.116 | -0.447  | -0.399    | -0.227 | -0.414  |

**Bayesian Pearson Correlations** Tower of London

|                  | PLI       |        |           | ERSP      |        |           |
|------------------|-----------|--------|-----------|-----------|--------|-----------|
|                  | 40-Hz EFR | IGF    | IGF-EFR   | 40-Hz EFR | IGF    | IGF-ERF   |
| Pearson's r      | -0.498 *  | 0.076  | -0.550 ** | -0.494 *  | 0.088  | -0.510 ** |
| BF <sub>10</sub> | 23.192    | 0.226  | 81.778    | 21.100    | 0.233  | 30.395    |
| Upper 95% CI     | -0.194    | 0.377  | -0.260    | -0.189    | 0.386  | -0.209    |
| Lower 95% CI     | -0.693    | -0.245 | -0.729    | -0.691    | -0.234 | -0.702    |

\* BF<sub>10</sub> > 10, \*\* BF<sub>10</sub> > 30, \*\*\* BF<sub>10</sub> > 100
